# Supplementary material
Source: publisher figshare collection journal article supplement (https://frontiersin.figshare.com/ndownloader/files/24744194)
Supplement: Supplementary file 1 [file 24744194]

## Sheet: Sheet1
	Compositions in mol% used for phase equilibria modelling
Sample	H2O (LOI)	SiO2	Al2O3	CaO	MgO	FeO	K2O	Na2O	TiO2	O (from Fe3+)	Cr2O3	Total
1045	2.22	52.15	9.87	11.69	16.34	4.6	0.09	2.66	0.12	0.23	0.02	100
1427	1.97	49.96	3.06	7.38	27.7	8.05	0.18	0.93	0.27	0.4	0.1	100
